# Supplementary material for: Diversity in the Development of the Neuromuscular System of Nemertean Larvae (Nemertea, Spiralia)
Source: Frontiers journal article supplement (doi:10.3389/fevo.2021.654846), 2021-05-24
Supplement: Table_1.DOCX [file Table_1.DOCX]

**Supplementary Table 1:** Adjustments of CLSM-stacks made with Fiji (ImageJ version 1.53c)

| Image | Image, Stacks, Z-Project… | Process, Subtract Background… (Rolling ball radius: 50 pixels) | Process, Math, Gamma… | Image, Adjust, Brightness/Contrast | Process, Filters, Unsharp Mask… (Radius: 1.0 pixels, Mask Weight: …) | Process, Noise, Remove Outliers… (Radius: 2.0 pixels, Theshold 50, bright) | Image, Transform, Rotate… / Translate… |
| --- | --- | --- | --- | --- | --- | --- | --- |
| Fig 1A | 14-44/57 | yes | 0.6 | 13-166 | 0.5 | yes | -20° / X: 0, Y: 0 |
| Fig. 1B | 8-35/41 | yes | 0.8 | 0-186 | 0.4 | yes | 146° / X: 0, Y: 0 |
| Fig. 1C | 1-27/35 | yes | 0.75 | 0-152 | 0.4 | yes | 48° / X: 0, Y: 0 |
| Fig. 1D | 8-21/28 | yes | 1.2 | 2-54 | 0.3 | no filtering | 44° / X: 0, Y: 0 |
| Fig. 2A | 7-32/34 | yes | 0.85 | 4-217 | 0.3 | yes | 93° / X: 0, Y: 0 |
| Fig. 2B | 7-32/34 | yes | 0.75 | 6-132 | 0.4 | yes | 93° / X: 0, Y: 0 |
| Fig. 4A | 11-21/37 | yes | 1.1 | 0-30 | 0.4 | yes | -66° / X: 0, Y: 0 |
| Fig. 4B | 11-29/38 | yes | 1.1 | 1-17 | 0.3 | yes | -147° / X: 0, Y: 0 |
| Fig. 4C | 30-44/50 | yes | 0.85 | 15-165 | no filtering | yes | 193° / X: 45, Y: -31 |
| Fig. 4D | 17-32/44 | yes | 0.8 | 3-45 | 0.5 | no filtering | -153° / X: 0, Y: 0 |
| Fig. 5A | 1-67/67 | yes | 0.9 | 9-203 | no filtering | yes | 180° / X: 0, Y: 0 |
| Fig. 5B | 10-21/26 | yes | 0.8 | 3-64 | 0.4 | yes | -50° / X: 0, Y: 0 |
| Fig. 5C | 16-24/29 | no background subtraction | 0.7 | 11-123 | 0.4 | no filtering | 164° / X: 0, Y: 0 |
| Fig. 5D | 1-27/27 | RFa: yes  pha: yes | RFa: 0.7  pha: 0.7 | RFa: 8-170  pha: 5-134 | RFa: 0.4  pha: 0.5 | RFa: no filtering  pha: no filtering | -92° / X: 0, Y: 0 |
| Fig. 6A | 1-47/52 | RFa: yes  pha: yes | RFa: 0.75  pha: 0.7 | RFa: 6-126  pha: 10-81 | RFa: 0.4  pha: no | RFa: yes  pha: no filtering | 60° / X: 0, Y: 0 |
| Fig. 6B | 15-40/45 | yes | 0.6 | 10-160 | 0.4 | no filtering | 122° / X: 0, Y: 0 |
| Fig. 6C | 1-45/48 | RFa: yes  pha: yes | RFa: 0.8  pha: 0.7 | RFa: 3-121  pha: 8-75 | RFa: 0.4  pha: no | RFa: no filtering  pha: yes | -75° / X: 0, Y: 0 |
| Fig. 6D | 17-37/52 | yes | 0.75 | 1-69 | 0.3 | yes | 147° / X: 0, Y: 0 |
| Fig. 7A | 1-50/50 | yes | no (1.0) | 5-67 | 0.4 | yes | 56° / X: 0, Y: 0 |
| Fig. 7B | 24-38/55 | yes | 1.1 | 1-53 | 0.4 | no filtering | 20° / X: 0, Y: 0 |
| Fig. 7C | 5-50/52 | yes | 0.7 | 5-167 | 0.4 | no filtering | 74° / X: 0, Y: 0 |
| Fig.7D | 16-31/39 | yes | 1.1 | 2-170 | 0.4 | no filtering | 5° / X: 0, Y: 0 |
| Fig. 8A | 19-29/40 | yes | 0.9 | 1-151 | 0.4 | yes | -97° / X: 42, Y: 0 |
| Fig. 8B | 16-28/40 | yes | 0.8 | 3-186 | 0.4 | yes | 181° / X: -220, Y: 0 |
